# Supplementary material
Source: PubMed Central journal article supplement (PMC3795115)
Supplement: SD4.pdf [file SD4.pdf]

## SUPPLEMENTAL TEXT 1

### Multiplex PCR assay to screen bacterial colonies on LVW agar.

An assay was used to screen colonies of *Leptospira* spp. growing on LVW agar and categorize these into pathogenic, intermediate or non-pathogenic *Leptospira* species. This was the first of a two-stage process in which colonies positive for pathogenic or intermediate *Leptospira* species were further evaluated using an *rrs* PCR assay and amplicon sequencing as described in the main text. Single colonies of *Leptospira* growing on LVW agar were inoculated into a 3 mL EMJH broth and incubated at 30°C in air for up to 7 days to achieve a *Leptospira* concentration of approximately 10<sup>8</sup> CFU/mL. DNA was prepared using a boiling method, as follows. The culture broth was centrifuged at 16,100 × *g* for 5 minutes, the supernatant discarded and the deposit suspended in 50 µL of sterile water. This was boiled at 100°C for 5 minutes using a T100™ Thermal Cycler (BIO-RAD, USA), centrifuged at 16,100 × *g* for 5 minutes, and the supernatant containing DNA transferred into a new 1.5 mL tube.

The multiplex PCR assay was based on *rrs* and *lipL32* genes and used six primers described previously.<sup>1-3</sup> These included four *rrs* primers (a single forward [rrs-ini] and three reverse primers [rrs-end, rrs-inner-R and rrs-outer-R]),<sup>1,2</sup> and two *lipL32* primers (LipL32-45F and LipL32-286R).<sup>3</sup> The single forward and outermost reverse *rrs* primers (rrs-end) anneal to all *Leptospira* species to give a 1483bp *rrs* amplicons.<sup>2</sup> The two additional reverse *rrs* primers (rrs-inner-R and rrs-outer-R) anneal to pathogenic and intermediate *Leptospira* species but not to non-pathogens to give an additional two amplicons (824bp and 573bp).<sup>1</sup> LipL32 is specific to pathogenic *Leptospira* species as *lipL32* primers designed by Stoddard and colleagues could not amplify the gene encoding LipL32 homolog of the intermediate *Leptospira*.<sup>3,4</sup> The *lipL32* primers give a single 242bp amplicon from pathogens alone.<sup>3</sup> This gives the following pattern of bands: pathogenic species, 4 bands; intermediate species, 3 bands; non-pathogenic species, 1 band.

The multiplex PCR assay was performed as follows. A 15 µL PCR reaction contained 200 µM of dNTP, 1.5 unit of Tag DNA polymerase (Roche, USA), and 1 pmol of each primer with the exception of rrs-outer-R (0.5 pmol) and rrs-inner-R (2 pmol). Cycling conditions were as follows: one cycle of 95°C for 2 minutes, 30 cycles of 95°C for 10 seconds, 50°C for 15 seconds and 72°C for 45 seconds, and one cycle of 72°C for 7 minutes. PCR products were visualised by 2% agarose gel electrophoresis.

Analytical specificity of the multiplex PCR assay was determined using DNA extracted from *Leptospiraceae* including 11 *Leptospira* species (seven pathogens: *L. interrogans* serovar Lai strain Lai, *L. kirschneri* serovar Cynopteri strain 3522 C, *L.*

*borgpetersenii* serovar Javanica strain Veldrat Batavia 46, *L. santarosai* serovar Shermani strain 1342K, *L. weilii* serovar Sarmin strain Sarmin, *L. noguchii* serovar Fortbragg strain Fort Bragg and *L. alstonii* serovar Pingchang strain 80-412; two intermediate group: *L. inadai* serovar Lyme strain 10 and *L. wolffii* strain H2; two non-pathogens: *L. biflexa* serovar Patoc strain Patoc I and *L. wobalchii* serovar Codice strain CDC), *Turneriella parva* serovar Parva strain H, and pathogenic organisms that are common causes of septicemia in our setting area (*Orientia tsutsugamushi*, *Staphylococcus aureus* and *Escherichia coli*). The pathogenic and intermediate group *Leptospira* species gave the predicted amplification patterns (4 bands and 3 bands, respectively). The 2 non-pathogenic *Leptospira* species and *Turneriella parva* gave a single 1483bp amplicon. No PCR product was amplified from *O. tsutsugamushi*, *S. aureus* or *E. coli*. This confirmed that the assay could be used to differentiate pathogenic and intermediate *Leptospira* species from non-pathogenic *Leptospira* species and *Turneriella parva*.

The multiplex PCR assay was performed on 140 single colonies, as described in the main text. Positive and negative controls were included in each run. The positive control used was genomic DNA of *L. interrogans* serovar Lai strain Lai. The results of multiplex screening were supported by *Leptospira* species classification based on *rrs* sequence. All 6 samples belonging to intermediate *Leptospira* species (including samples closely related to *L. licerasiae*) gave a 3-band pattern, and a single sample belonging to a novel putative pathogenic *Leptospira* species gave a 4-band pattern.

## REFERENCES

1. Boonsilp S, Thaipadungpanit J, Amornchai P, Wuthiekanun V, Chierakul W, Limmathurotsakul D, Day NP, Peacock SJ, 2011. Molecular detection and speciation of pathogenic *Leptospira* spp. in blood from patients with culture-negative leptospirosis. *BMC Infect Dis* 11: 338.
2. Thaipadungpanit J, Wuthiekanun V, Chierakul W, Smythe LD, Petkanchanapong W, Limpaboon R, Apiwatanaporn A, Slack AT, Suputtamongkol Y, White NJ, Feil EJ, Day NP, Peacock SJ, 2007. A dominant clone of *Leptospira interrogans* associated with an outbreak of human leptospirosis in Thailand. *PLoS Negl Trop Dis* 1: e56.
3. Stoddard RA, Gee JE, Wilkins PP, McCaustland K, Hoffmaster AR, 2009. Detection of pathogenic *Leptospira* spp. through TaqMan polymerase chain reaction targeting the LipL32 gene. *Diagn Microbiol Infect Dis* 64: 247–255.
4. Matthias MA, Ricardi JN, Cespedes M, Diaz MM, Galloway RL, Saito M, Steigerwalt AG, Patra KP, Ore CV, Gotuzzo E, Gilman RH, Levett PN, Vinetz JM, 2008. Human leptospirosis caused by a new, antigenically unique *Leptospira* associated with a *Rattus* species reservoir in the Peruvian Amazon. *PLoS Negl Trop Dis* 2: e213.

SUPPLEMENTAL TABLE 1  
*rrs* sequences from GenBank data used in phylogenetic analysis to identify *Leptospira* species

| Group                                                                       | Species                  | GenBank ID                                     |
|-----------------------------------------------------------------------------|--------------------------|------------------------------------------------|
| Pathogenic <i>Leptospira</i>                                                | <i>L. alexanderi</i>     | DQ991482                                       |
|                                                                             | <i>L. alstoni</i>        | AY631881                                       |
|                                                                             | <i>L. borgpetersenii</i> | AM050573                                       |
|                                                                             | <i>L. interrogans</i>    | AE010300, FJ154564                             |
|                                                                             | <i>L. kirschneri</i>     | FJ154572, AY461878                             |
|                                                                             | <i>L. noguchii</i>       | FJ154588, FJ154582, EU349495                   |
|                                                                             | <i>L. santarosai</i>     | AY996805, AY631883, AY461888, Z21649, FJ154576 |
| Putative pathogenic <i>Leptospira</i>                                       | <i>L. weilii</i>         | FJ154590, DQ483058                             |
|                                                                             | <i>L. kmetyi</i>         | AB279549                                       |
| Intermediate <i>Leptospira</i>                                              | <i>L. broomii</i>        | AY792329                                       |
|                                                                             | <i>L. fainei</i>         | AY631885, U60594                               |
|                                                                             | <i>L. inadai</i>         | AY631891                                       |
|                                                                             | <i>L. licerasiae</i>     | EF612280                                       |
|                                                                             | <i>L. wolffii</i>        | EF025496                                       |
|                                                                             | <i>L. biflexa</i>        | CP000786, FJ154577                             |
|                                                                             | <i>L. meyeri</i>         | AY631892                                       |
| Non-pathogenic <i>Leptospira</i> and other species of <i>Leptospiraceae</i> | <i>L. terpstrae</i>      | AY631888                                       |
|                                                                             | <i>L. vanthielii</i>     | AY631897                                       |
|                                                                             | <i>L. wolbachii</i>      | AY631890                                       |
|                                                                             | <i>L. yanagawae</i>      | AY631882                                       |
|                                                                             | <i>Leptonema illini</i>  | NR043139                                       |
|                                                                             | <i>Turneriella parva</i> | AY293856                                       |
|                                                                             | Unculturable bacteria    | FJ164045, DQ065390, FJ820401                   |

SUPPLEMENTAL TABLE 2  
*rrs* sequences of *Leptospira* species submitted to GenBank

| Group                          | Sample code-isolate code       | Species                    | GenBank ID        |
|--------------------------------|--------------------------------|----------------------------|-------------------|
| Unculturable <i>Leptospira</i> | 65 nested PCR-positive samples | Unknown                    | JX857331-JX857395 |
| Pathogenic <i>Leptospira</i>   | NP-29-Q1                       | Unknown                    | JX857402          |
|                                | NP-29-Q3                       | Unknown                    | JX857403          |
| Intermediate <i>Leptospira</i> | NP-46-Q127                     | <i>L. licerasiae</i>       | JX857396          |
|                                | NP-49-Q74                      | <i>L. wolffii</i>          | JX857397          |
|                                | NP-63-Q40                      | Probable <i>L. wolffii</i> | JX857398          |
|                                | NP-64-Q41                      | Unknown                    | JX857399          |
|                                | NP-21-Q103                     | <i>L. licerasiae</i>       | JX857400          |
|                                | NP-30-Q29                      | Unknown                    | JX857401          |
|                                | NP-30-Q61                      | Unknown                    | JX857408          |

SUPPLEMENTAL TABLE 3

Polymorphic sites and nucleotide distance between 6 *Leptospira rrs* sequences generated in this study versus reference sequences for *L. wolffii* and *L. licerasiae*

|                      | Polymorphic sites* |   |   |   |     |   |   |   |   |   |   |   |   |   |   |   |   |   | Nucleotide distance† (%) |                      |                      |
|----------------------|--------------------|---|---|---|-----|---|---|---|---|---|---|---|---|---|---|---|---|---|--------------------------|----------------------|----------------------|
|                      |                    |   |   |   |     |   |   |   |   |   |   |   |   |   |   |   |   |   | <i>L. wolffii</i>        | <i>L. licerasiae</i> |                      |
|                      | 1                  | 1 | 1 | 1 | 1   | 1 | 1 | 1 | 1 | 1 | 1 | 1 | 1 | 1 | 2 | 2 | 3 |   |                          |                      |                      |
|                      | 3                  | 3 | 8 | 9 | 9   | 9 | 0 | 2 | 2 | 2 | 5 | 6 | 7 | 7 | 8 | 8 | 8 | 8 |                          |                      |                      |
|                      | 4                  | 7 | 3 | 4 | 5   | 7 | 8 | 4 | 6 | 7 | 3 | 1 | 1 | 2 | 1 | 2 | 2 | 7 | 1                        | <i>L. wolffii</i>    | <i>L. licerasiae</i> |
| <i>L. wolffii</i>    | C                  | A | T | A | C   | G | A | T | C | G | A | A | T | C | G | A | G | C | A                        |                      |                      |
| <i>L. licerasiae</i> | .                  | . | . | . | .   | . | . | . | . | . | . | . | . | . | . | . | C | G | .                        | 0.45                 |                      |
| NP-21                | .                  | . | . | . | .   | . | . | . | . | . | . | . | . | . | . | . | C | G | .                        | 0.45                 | 0                    |
| NP-46                | .                  | . | . | . | .   | . | . | . | . | . | . | . | . | . | . | . | C | G | .                        | 0.45                 | 0                    |
| NP-49                | .                  | . | . | . | .   | . | . | . | . | . | . | . | . | . | . | . | . | . | .                        | 0                    | 0.45                 |
| NP-63                | .                  | . | . | . | C/T | . | . | . | . | . | . | . | . | . | . | . | . | . | A/G                      | 0                    | 0.45                 |
| NP-64                | T                  | G | C | T | .   | A | G | C | T | A | T | G | C | T | T | G | C | G | .                        | 3.84                 | 3.39                 |
| NP-30                | .                  | . | . | . | .   | . | . | . | . | . | T | . | . | . | T | . | C | G | .                        | 0.90                 | 0.45                 |

\*A total of 19 polymorphic sites were demonstrated based on the 443-nucleotide fragment of the *rrs* gene. The vertical numbers indicate the nucleotide positions, and a dot indicates an identical nucleotide at that position.

†Pairwise comparisons of nucleotide distance between 6 floodwater isolates (belonging to intermediate group *Leptospira*) and 2 reference sequences (*L. wolffii* [EF025496] and *L. licerasiae* [EF612280]) were analysed base on the 443-nucleotide fragment of the *rrs* gene. NP-30 and NP-64 were most closely related to *L. licerasiae* with a nucleotide distance of 0.45% and 3.39%, respectively.

SUPPLEMENTAL TABLE 4  
Results of direct PCR assay and *Leptospira* culture for 110 water samples

| Sample ID | Direct PCR assay | <i>Leptospira</i> spp. identified from direct PCR amplicons | <i>Leptospira</i> culture | <i>Leptospira</i> group identified by multiplex PCR screening   | Species identification for pathogenic and intermediate <i>Leptospira</i> |
|-----------|------------------|-------------------------------------------------------------|---------------------------|-----------------------------------------------------------------|--------------------------------------------------------------------------|
|           |                  |                                                             |                           | (number of colonies tested)                                     |                                                                          |
| NP01      | negative         |                                                             | negative                  |                                                                 |                                                                          |
| NP02      | positive         | unculturable <i>Leptospira</i>                              | negative                  |                                                                 |                                                                          |
| NP04      | positive         | unculturable <i>Leptospira</i>                              | positive                  | non-pathogen (4)                                                |                                                                          |
| NP05      | negative         |                                                             | positive                  | non-pathogen (2)                                                |                                                                          |
| NP06      | positive         | unculturable <i>Leptospira</i>                              | negative                  |                                                                 |                                                                          |
| NP09      | negative         |                                                             | positive                  | non-pathogen (1)                                                |                                                                          |
| NP10      | positive         | unculturable <i>Leptospira</i>                              | negative                  |                                                                 |                                                                          |
| NP12      | negative         |                                                             | positive                  | non-pathogen (2)                                                |                                                                          |
| NP18      | negative         |                                                             | negative                  |                                                                 |                                                                          |
| NP20      | positive         | unculturable <i>Leptospira</i>                              | positive                  | non-pathogen (2)                                                |                                                                          |
| NP21      | positive         | unsuccessful in DNA sequencing                              | positive                  | intermediate (1)                                                | <i>L. licerasiae</i>                                                     |
| NP22      | negative         |                                                             | positive                  | non-pathogen (1)                                                |                                                                          |
| NP23      | positive         | unculturable <i>Leptospira</i>                              | negative                  |                                                                 |                                                                          |
| NP24      | positive         | unculturable <i>Leptospira</i>                              | positive                  | non-pathogen (3)                                                |                                                                          |
| NP25      | positive         | unculturable <i>Leptospira</i>                              | positive                  | non-pathogen (1)                                                |                                                                          |
| NP26      | positive         | unculturable <i>Leptospira</i>                              | positive                  | non- <i>Leptospiraceae</i> spirochetes (2),<br>non-pathogen (1) |                                                                          |
| NP27      | positive         | unculturable <i>Leptospira</i>                              | positive                  | non-pathogen (2)                                                |                                                                          |
| NP28      | positive         | unculturable <i>Leptospira</i>                              | positive                  | non-pathogen (2)                                                |                                                                          |
| NP29      | positive         | unculturable <i>Leptospira</i>                              | positive                  | pathogen (2)                                                    | closely related to<br><i>L. alstonii</i>                                 |
| NP30      | positive         | unculturable <i>Leptospira</i>                              | positive                  | non-pathogen (1), intermediate (2)                              | closely related to<br><i>L. licerasiae</i>                               |
| NP31      | positive         | unculturable <i>Leptospira</i>                              | positive                  | non-pathogen (1)                                                |                                                                          |
| NP32      | negative         |                                                             | positive                  | non-pathogen (2)                                                |                                                                          |
| NP33      | positive         | unculturable <i>Leptospira</i>                              | negative                  |                                                                 |                                                                          |
| NP34      | negative         |                                                             | positive                  | non-pathogen (1)                                                |                                                                          |
| NP35      | negative         |                                                             | positive                  | non- <i>Leptospiraceae</i> spirochetes (2)                      |                                                                          |
| NP36      | negative         |                                                             | positive                  | non-pathogen (2)                                                |                                                                          |
| NP37      | negative         |                                                             | positive                  | non-pathogen (1)                                                |                                                                          |
| NP38      | positive         | unculturable <i>Leptospira</i>                              | positive                  | non-pathogen (1)                                                |                                                                          |
| NP39      | negative         |                                                             | positive                  | non-pathogen (1)                                                |                                                                          |
| NP40      | negative         |                                                             | positive                  | non-pathogen (2)                                                |                                                                          |
| NP41      | negative         |                                                             | positive                  | non-pathogen (2)                                                |                                                                          |
| NP42      | positive         | unculturable <i>Leptospira</i>                              | positive                  | non-pathogen (2)                                                |                                                                          |
| NP43      | negative         |                                                             | positive                  | non-pathogen (1)                                                |                                                                          |
| NP44      | positive         | unsuccessful in DNA sequencing                              | positive                  | non-pathogen (2)                                                |                                                                          |
| NP45      | negative         |                                                             | positive                  | non-pathogen (1)                                                |                                                                          |
| NP46      | positive         | unsuccessful in DNA sequencing                              | positive                  | intermediate (1)                                                | <i>L. licerasiae</i>                                                     |
| NP47      | positive         | unculturable <i>Leptospira</i>                              | positive                  | non-pathogen (2)                                                |                                                                          |
| NP48      | negative         |                                                             | negative                  |                                                                 |                                                                          |
| NP49      | positive         | unsuccessful in DNA sequencing                              | positive                  | non-pathogen (1), intermediate (1)                              | <i>L. wolffii</i>                                                        |
| NP50      | negative         |                                                             | positive                  | non-pathogen (1)                                                |                                                                          |
| NP51      | negative         |                                                             | positive                  | non-pathogen (1)                                                |                                                                          |
| NP52      | positive         | unsuccessful in DNA sequencing                              | positive                  | non-pathogen (1)                                                |                                                                          |
| NP53      | positive         | unculturable <i>Leptospira</i>                              | positive                  | non-pathogen (1)                                                |                                                                          |
| NP54      | positive         | unculturable <i>Leptospira</i>                              | positive                  | non-pathogen (1)                                                |                                                                          |
| NP55      | positive         | unculturable <i>Leptospira</i>                              | positive                  | non-pathogen (1)                                                |                                                                          |
| NP56      | positive         | unculturable <i>Leptospira</i>                              | positive                  | non-pathogen (1)                                                |                                                                          |
| NP57      | positive         | unculturable <i>Leptospira</i>                              | positive                  | non- <i>Leptospiraceae</i> spirochetes (1),<br>non-pathogen (1) |                                                                          |
| NP58      | negative         |                                                             | positive                  | non-pathogen (1)                                                |                                                                          |
| NP59      | negative         |                                                             | negative                  |                                                                 |                                                                          |
| NP60      | negative         |                                                             | positive                  | non-pathogen (2)                                                |                                                                          |
| NP61      | negative         |                                                             | positive                  | non-pathogen (1)                                                |                                                                          |
| NP62      | negative         |                                                             | negative                  |                                                                 |                                                                          |
| NP63      | negative         |                                                             | positive                  | intermediate (1)                                                | <i>L. wolffii</i>                                                        |
| NP64      | negative         |                                                             | positive                  | intermediate (1)                                                | closely related to<br><i>L. licerasiae</i>                               |
| NP65      | negative         |                                                             | positive                  | non- <i>Leptospiraceae</i> spirochetes (1)                      |                                                                          |
| NP66      | negative         |                                                             | positive                  | non-pathogen (2)                                                |                                                                          |
| NP67      | negative         |                                                             | positive                  | non-pathogen (2)                                                |                                                                          |
| NP68      | negative         |                                                             | positive                  | non-pathogen (1)                                                |                                                                          |
| NP69      | positive         | unculturable <i>Leptospira</i>                              | negative                  |                                                                 |                                                                          |
| NP70      | positive         | unculturable <i>Leptospira</i>                              | positive                  | non-pathogen (1)                                                |                                                                          |
| NP71      | positive         | unsuccessful in DNA sequencing                              | negative                  |                                                                 |                                                                          |
| NP72      | positive         | unsuccessful in DNA sequencing                              | positive                  | non-pathogen (1)                                                |                                                                          |

(continued)

SUPPLEMENTAL TABLE 4  
Continued

| Sample ID | Direct PCR assay | <i>Leptospira</i> spp. identified from direct PCR amplicons | <i>Leptospira</i> culture | <i>Leptospira</i> group identified by multiplex PCR screening   | Species identification for pathogenic and intermediate <i>Leptospira</i> |
|-----------|------------------|-------------------------------------------------------------|---------------------------|-----------------------------------------------------------------|--------------------------------------------------------------------------|
|           |                  |                                                             |                           | (number of colonies tested)                                     |                                                                          |
| NP73      | positive         | unculturable <i>Leptospira</i>                              | positive                  | non-pathogen (1)                                                |                                                                          |
| NP74      | positive         | unculturable <i>Leptospira</i>                              | positive                  | non-pathogen (1)                                                |                                                                          |
| NP75      | positive         | unculturable <i>Leptospira</i>                              | negative                  |                                                                 |                                                                          |
| NP76      | positive         | unculturable <i>Leptospira</i>                              | positive                  | non-pathogen (1)                                                |                                                                          |
| NP77      | positive         | unculturable <i>Leptospira</i>                              | positive                  | non-pathogen (1)                                                |                                                                          |
| NP78      | positive         | unculturable <i>Leptospira</i>                              | positive                  | non-pathogen (1)                                                |                                                                          |
| NP79      | positive         | unsuccessful in DNA sequencing                              | positive                  | non-pathogen (2)                                                |                                                                          |
| NP80      | positive         | unsuccessful in DNA sequencing                              | positive                  | non-pathogen (2)                                                |                                                                          |
| DM01      | positive         | unculturable <i>Leptospira</i>                              | positive                  | non-pathogen (1)                                                |                                                                          |
| DM02      | positive         | unculturable <i>Leptospira</i>                              | positive                  | non-pathogen (1)                                                |                                                                          |
| DM03      | positive         | unculturable <i>Leptospira</i>                              | negative                  |                                                                 |                                                                          |
| DM04      | positive         | unculturable <i>Leptospira</i>                              | positive                  | non-pathogen (2)                                                |                                                                          |
| DM05      | negative         |                                                             | negative                  |                                                                 |                                                                          |
| DM06      | positive         | unculturable <i>Leptospira</i>                              | negative                  |                                                                 |                                                                          |
| DM07      | positive         | unculturable <i>Leptospira</i>                              | positive                  | non- <i>Leptospiraceae</i> spirochetes (2)                      |                                                                          |
| DM08      | positive         | unculturable <i>Leptospira</i>                              | positive                  | non-pathogen (2)                                                |                                                                          |
| DM09      | positive         | unculturable <i>Leptospira</i>                              | negative                  |                                                                 |                                                                          |
| DM10      | positive         | unculturable <i>Leptospira</i>                              | positive                  | non-pathogen (1)                                                |                                                                          |
| DM11      | negative         |                                                             | negative                  |                                                                 |                                                                          |
| DM12      | positive         | unculturable <i>Leptospira</i>                              | positive                  | non-pathogen (2)                                                |                                                                          |
| DM13      | positive         | unculturable <i>Leptospira</i>                              | negative                  |                                                                 |                                                                          |
| DM14      | positive         | unculturable <i>Leptospira</i>                              | negative                  |                                                                 |                                                                          |
| DM15      | positive         | unculturable <i>Leptospira</i>                              | positive                  | non-pathogen (1)                                                |                                                                          |
| DM16      | positive         | unculturable <i>Leptospira</i>                              | negative                  |                                                                 |                                                                          |
| DM17      | negative         |                                                             | positive                  | non-pathogen (2)                                                |                                                                          |
| DM18      | positive         | unculturable <i>Leptospira</i>                              | positive                  | non-pathogen (2)                                                |                                                                          |
| DM19      | positive         | unculturable <i>Leptospira</i>                              | positive                  | non-pathogen (1)                                                |                                                                          |
| DM20      | positive         | unculturable <i>Leptospira</i>                              | positive                  | non-pathogen (1)                                                |                                                                          |
| DM21      | positive         | unculturable <i>Leptospira</i>                              | positive                  | non- <i>Leptospiraceae</i> spirochetes (3)                      |                                                                          |
| DM22      | positive         | unculturable <i>Leptospira</i>                              | positive                  | non-pathogen (1)                                                |                                                                          |
| DM23      | positive         | unculturable <i>Leptospira</i>                              | positive                  | non-pathogen (3)                                                |                                                                          |
| DM24      | positive         | unculturable <i>Leptospira</i>                              | positive                  | non-pathogen (1)                                                |                                                                          |
| DM25      | positive         | unsuccessful in DNA sequencing                              | positive                  | non-pathogen (1)                                                |                                                                          |
| DM26      | positive         | unculturable <i>Leptospira</i>                              | positive                  | non-pathogen (1)                                                |                                                                          |
| DM27      | positive         | unculturable <i>Leptospira</i>                              | positive                  | non-pathogen (1)                                                |                                                                          |
| DM28      | positive         | unculturable <i>Leptospira</i>                              | positive                  | non- <i>Leptospiraceae</i> spirochetes (3)                      |                                                                          |
| DM29      | positive         | unculturable <i>Leptospira</i>                              | positive                  | non- <i>Leptospiraceae</i> spirochetes (2),<br>non-pathogen (3) |                                                                          |
| DM30      | positive         | unculturable <i>Leptospira</i>                              | positive                  | non- <i>Leptospiraceae</i> spirochetes (4)                      |                                                                          |
| DM31      | positive         | unculturable <i>Leptospira</i>                              | positive                  | non-pathogen (1)                                                |                                                                          |
| DM32      | positive         | unculturable <i>Leptospira</i>                              | positive                  | non-pathogen (1)                                                |                                                                          |
| DM33      | positive         | unculturable <i>Leptospira</i>                              | positive                  | non-pathogen (1)                                                |                                                                          |
| DM34      | positive         | unculturable <i>Leptospira</i>                              | positive                  | non-pathogen (2)                                                |                                                                          |
| DM35      | negative         |                                                             | negative                  |                                                                 |                                                                          |
| DM36      | positive         | unculturable <i>Leptospira</i>                              | positive                  | non-pathogen (1)                                                |                                                                          |
| DM37      | positive         | unculturable <i>Leptospira</i>                              | positive                  | non-pathogen (1)                                                |                                                                          |
| DM38      | positive         | unsuccessful in DNA sequencing                              | positive                  | non-pathogen (2)                                                |                                                                          |
| DM39      | positive         | unculturable <i>Leptospira</i>                              | positive                  | non-pathogen (3)                                                |                                                                          |
| DM40      | positive         | unculturable <i>Leptospira</i>                              | negative                  |                                                                 |                                                                          |
